# Supplementary material for: Quality assurance of hematopoietic stem cells by macrophages determines stem cell clonality
Source: PubMed Central journal article supplement (PMC9524573; doi:10.1126/science.abo4837), 2022-09-22
Supplement: NIHMS1835312-supplement-Supp_Fig_3.pdf [file NIHMS1835312-supplement-Supp_Fig_3.pdf]

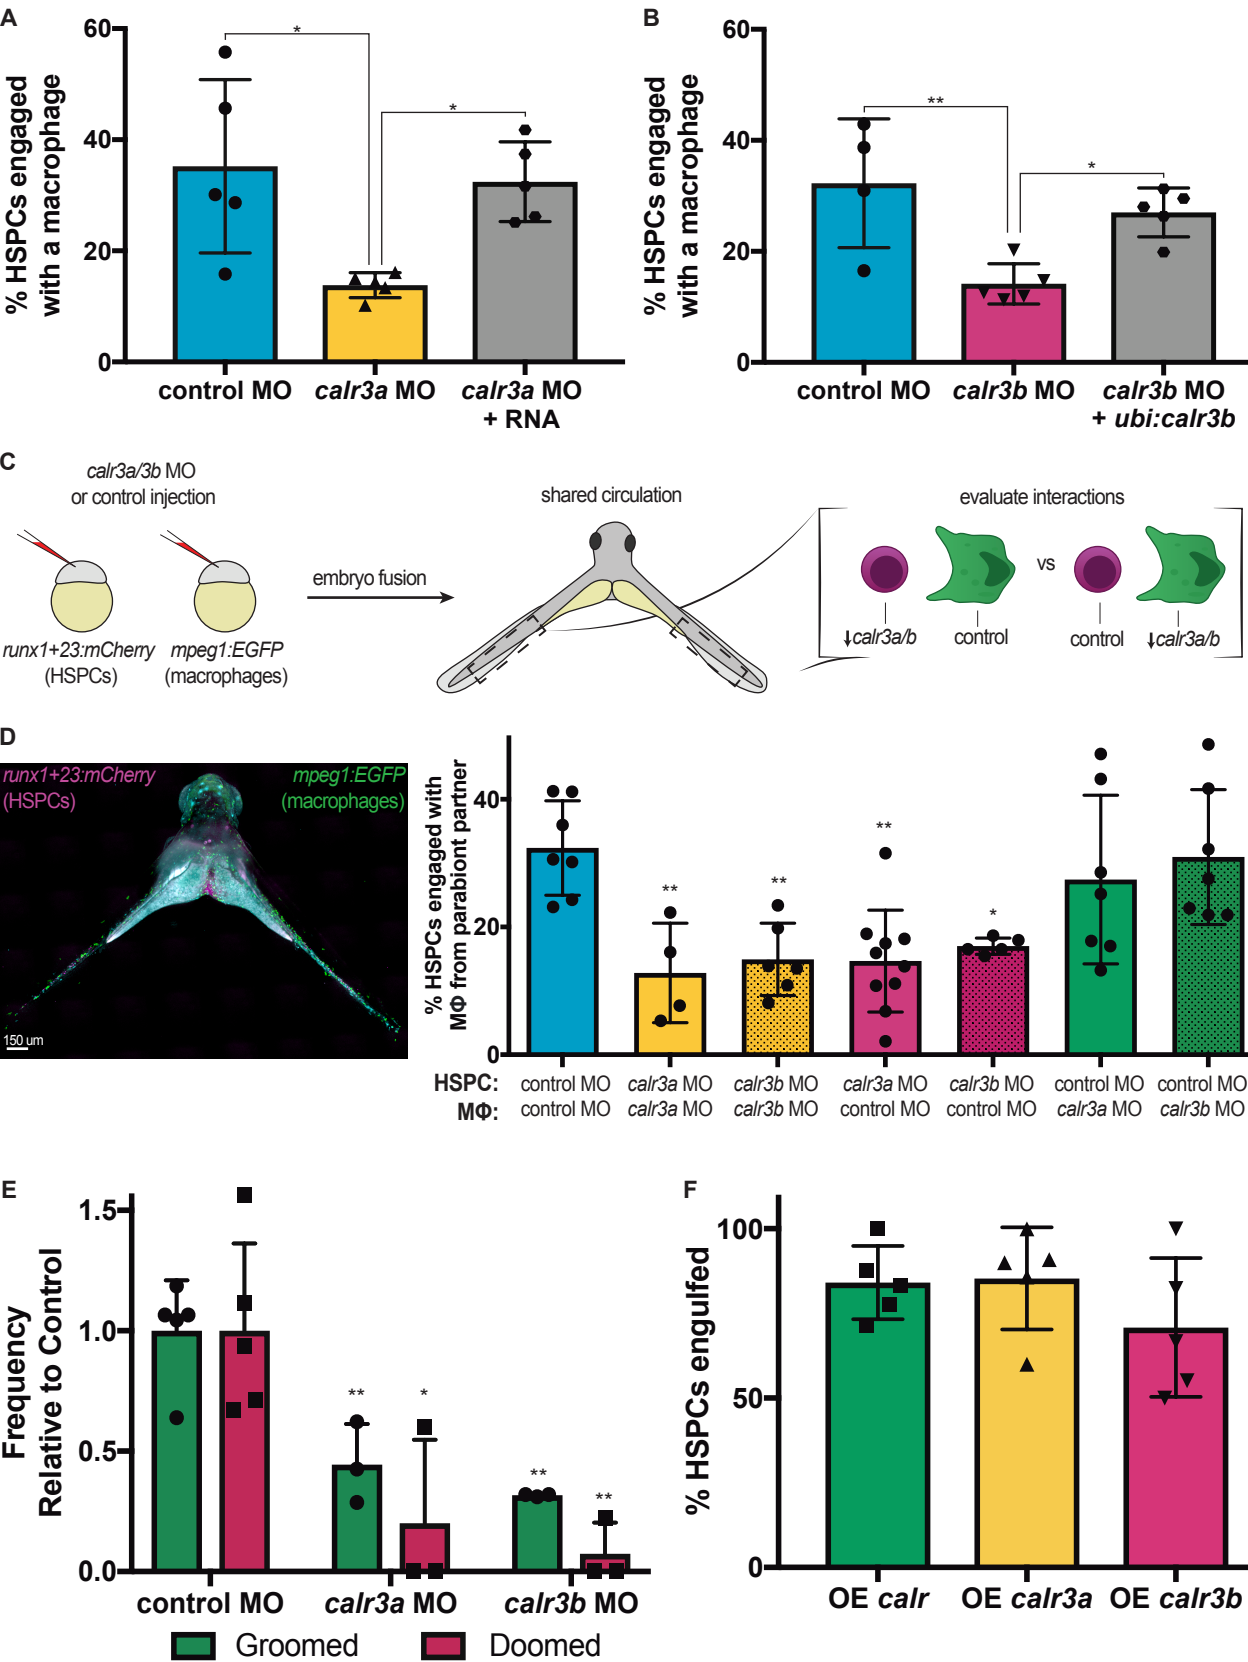

Supplemental Figure 3
