# Supplementary material for: Quality assurance of hematopoietic stem cells by macrophages determines stem cell clonality
Source: PubMed Central journal article supplement (PMC9524573; doi:10.1126/science.abo4837), 2022-09-22
Supplement: NIHMS1835312-supplement-Table_S1.pdf [file NIHMS1835312-supplement-Table_S1.pdf]

**Table S1. Primer sequences used in this study**

|                                  |                                                           |
|----------------------------------|-----------------------------------------------------------|
| <i>hmox1a</i> ISH fwd            | 5' CATTAAACCCTCACTAAAGGGAACAGGACTTGGAGCACTTCTTCGG 3'      |
| <i>hmox1a</i> ISH rev            | 5' TAATACGACTCACTATAGGGAGACAACCTCAAAGCGTTTATGGACAG 3'     |
| <i>ctsl.1</i> ISH fwd            | 5' CATTAAACCCTCACTAAAGGGAAGATCAGAAACAGTGTGGATCATGC 3'     |
| <i>ctsl.1</i> ISH rev            | 5' TAATACGACTCACTATAGGGCCTAGACAGGGGCATTAATAAATGAAAACAG 3' |
| <i>slc40a1</i> ISH fwd           | 5' CATTAAACCCTCACTAAAGGGAACAAACCTGTCGCCGAAGTTCAC 3'       |
| <i>slc40a1</i> ISH rev           | 5' TAATACGACTCACTATAGGGATAATCCTCCCCTGCGATGG 3'            |
| <i>calr</i> fwd                  | 5' CACCATGACTGCGTTATCCCTACTGTTTATG 3'                     |
| <i>mTagBFP</i> fwd               | 5' CACCATGAGCGAGCTGATTAAGGAGAACA 3'                       |
| <i>mTagBFP</i> rev               | 5' TTAATTAAGCTTGTGCCCCAGTTTGCT 3'                         |
| <i>calr</i> NOKDEL NO STOP rev   | 5' GAGTTTAGAGTCTGTTTCCTCCTCCTC 3'                         |
| <i>calr3a</i> fwd                | 5' CACCATGCGGATCACTGCTGCA 3'                              |
| <i>calr3a</i> rescue fwd         | 5' CACCATGAGAATAACAGCCGCCGTGTGCTTTATTTCTGCACTGGC 3'       |
| <i>calr3a</i> rev                | 5' GATCATCTAGACTACAATTCATCTTTAGGGAGCGCATCAT 3'            |
| <i>calr3a</i> NOKDEL NO STOP rev | 5' AGGGAGCGCATCATCCTCA 3'                                 |
| <i>calr3b</i> fwd                | 5' CACCATGCAAATTTTATTATTACAGTTAATTTTCGGCT 3'              |
| <i>calr3b</i> rev                | 5' GATCATCTAGACTACAGTTCGTCTTTCTGAAGCACATC 3'              |
| <i>calr3b</i> NOKDEL NO STOP rev | 5' CTGAAGCACATCCTCGTCTCC 3'                               |
