# Supplementary material for: Quality assurance of hematopoietic stem cells by macrophages determines stem cell clonality
Source: PubMed Central journal article supplement (PMC9524573; doi:10.1126/science.abo4837), 2022-09-22
Supplement: NIHMS1835312-supplement-Table_S2.pdf [file NIHMS1835312-supplement-Table_S2.pdf]

**Table S2. Sequences for morpholinos used in this study**

| Morpholino       | Sequence                        | Source     |
|------------------|---------------------------------|------------|
| standard control | 5' CCTCTTACCTCAGTTACAATTTATA 3' | GeneTools  |
| <i>irf8</i>      | 5' TCAGTCTGCGACCGCCCGAGTTCAT 3' | (16)       |
| <i>calr</i>      | 5' AACAGTAGGGATAACGCAGTCATCT 3' | This paper |
| <i>calr3a</i>    | 5' GCAGCAGTGATCCGCATCTCTGCAC 3' | This paper |
| <i>calr3b</i>    | 5' AAAGAAATGACTCCCGCACGCTCGC 3' | This paper |
| <i>perk</i>      | 5' ACTGAAACCCCTTTCCATTGGGAC 3'  | (55)       |
| <i>ern1</i>      | 5' CGCCATCACGCACACATATAAACG 3'  | This paper |
| <i>atf6</i>      | 5' ACATTAAATTCGACGACATTGTGCC 3' | (56)       |
| <i>illb</i>      | 5' CCCACAAACTGCAAAATATCAGCTT 3' | (31)       |
